# Supplementary material
Source: HighWire-hosted journal article supplement (https://gh.bmj.com/content/7/3/e007370)

## Supplemental Figure 1: Screening Methodology

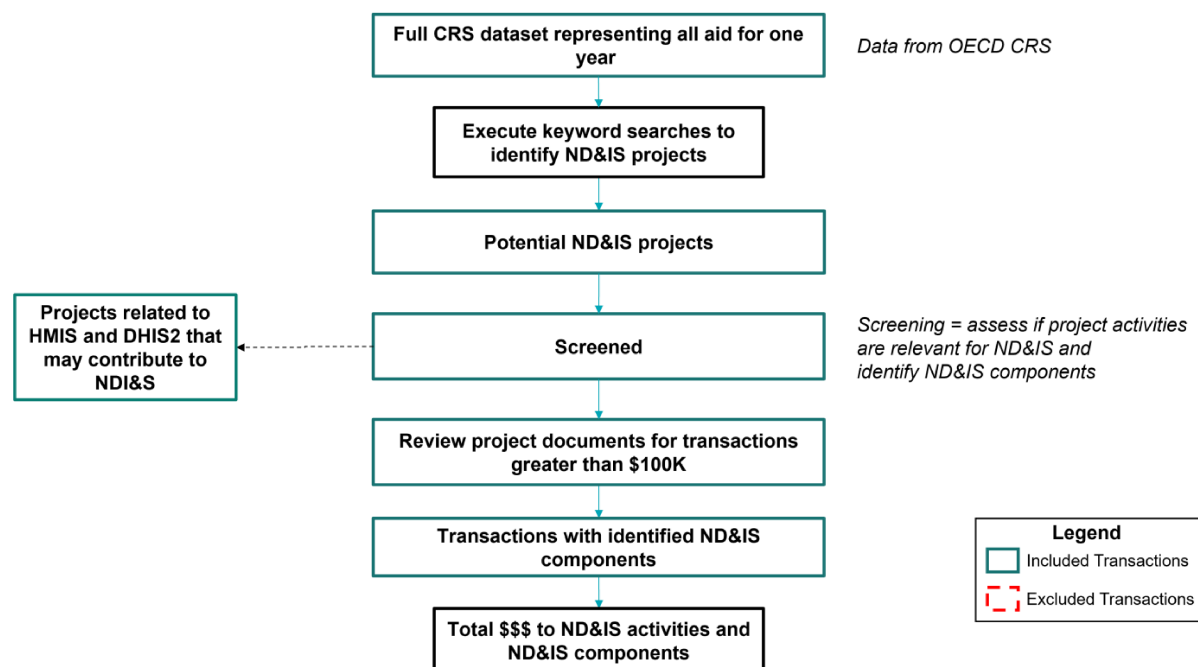

Supplement: inline-supplementary-material-5 [file inline-supplementary-material-5.pdf]
